**1 Use of whole genome sequencing to investigate an outbreak of gonorrhoea**  
**2 among females in urban New South Wales, Australia, 2012 to 2014.**

**3 Cameron Buckley<sup>1</sup>, Brian M. Forde<sup>2,3,4</sup>, Ella Trembizki<sup>1</sup>, Monica M. Lahra<sup>5,6</sup>, Scott A.**  
**4 Beatson<sup>2,3,4</sup> and David M. Whiley<sup>1,2,7\*</sup>.**

**5**

**6 <sup>1</sup> The University of Queensland, UQ Centre for Clinical Research, Herston,**  
**7 Queensland 4029, Australia.**

**8 <sup>2</sup> Australian Infectious Diseases Research Centre, The University of Queensland,**  
**9 Brisbane, Queensland 4072, Australia.**

**10 <sup>3</sup> Australian Centre for Ecogenomics, The University of Queensland, Brisbane,**  
**11 Queensland 4072, Australia.**

**12 <sup>4</sup> School of Chemistry and Molecular Biosciences, The University of Queensland,**  
**13 Brisbane, Queensland, 4072 Australia.**

**14 <sup>5</sup> WHO Collaborating Centre for STD, Microbiology Department, New South Wales**  
**15 Health Pathology East, Prince of Wales Hospital, Sydney, New South Wales 2031,**  
**16 Australia.**

**17 <sup>6</sup> School of Medical Sciences, The University of New South Wales, Sydney, New**  
**18 South Wales 2052, Australia.**

**19 <sup>7</sup> Pathology Queensland, Microbiology Department, Herston, Queensland 4029,**  
**20 Australia.**

**21**

**22 Corresponding Author**

**23 \* David. M. Whiley. The University of Queensland, UQ Centre for Clinical Research,**  
**24 Herston, Queensland 4029, Australia. (d.whiley@uq.edu.au)**

## 25    **Abstract**

26    Increasing rates of gonorrhoea have been observed among urban heterosexuals within  
 27    the Australian state of New South Wales (NSW). Here, we applied whole genome  
 28    sequencing (WGS) to better understand transmission dynamics. Ninety-four isolates  
 29    of a particular *N. gonorrhoeae* genotype (G122) associated with female patients  
 30    (years 2012 to 2014) underwent phylogenetic analysis using core single nucleotide  
 31    polymorphisms (SNPs). Context for genetic variation was provided by including an  
 32    unbiased selection of 1,870 *N. gonorrhoeae* genomes from a recent United Kingdom  
 33    (UK) study. NSW genomes formed a single clade, with the majority of isolates  
 34    belonging to one of five clusters, and comprised patients of varying age groups. Intra-  
 35    patient variability was less than 7 core SNPs. Several patients had indistinguishable  
 36    core SNPs, suggesting a common infection source. These data have provided an  
 37    enhanced understanding of transmission of *N. gonorrhoeae* among urban  
 38    heterosexuals in NSW, Australia, and highlight the value of using WGS in *N.*  
 39    *gonorrhoeae* outbreak investigations.

40

## 41    **Keywords**

42    *Neisseria gonorrhoeae*; genomics; epidemiology; Australia; gonorrhoea; molecular.

43

## 44    **Background**

45    Notification rates for *Neisseria gonorrhoeae* infection in Australia have almost  
 46    doubled in the last 5 years (1). Gonorrhoea is primarily concentrated in two key  
 47    populations in Australia: men who have sex with men (MSM) living in urban areas  
 48    and Indigenous heterosexuals in regional and remote settings (2). Until recently, there  
 49    have been relatively low rates of gonorrhoea among heterosexuals living in urban

50 areas of Australia (3, 4). A retrospective study involving two sexual health clinics in  
 51 urban Sydney, New South Wales (NSW), showed increasing rates among  
 52 heterosexuals from 2008 to 2012 (3) that were associated with unprotected oral sex  
 53 and commercial sex work (CSW). Our subsequent nationwide study of *N.*  
 54 *gonorrhoeae* genotypes conducted using isolates from throughout Australia in 2012  
 55 revealed the most common gonococcal strain was associated with heterosexuals, and  
 56 was particularly prevalent among females in NSW (5). A further investigation (6)  
 57 showed this strain remained prevalent within NSW in 2014 and, although not  
 58 remarked upon in the article, was prevalent among females. Combined, the above  
 59 studies are highly suggestive of an emerging epidemic of gonorrhoea among urban  
 60 heterosexuals in Australia.

61  
 62 A limitation of the genotyping protocol used in our previous studies was that whilst it  
 63 targets 25 informative single nucleotide polymorphisms (SNPs) across the gonococcal  
 64 genome, it lacks the resolution offered by whole genome sequencing (WGS). The  
 65 limitations of traditional genotyping methods have been highlighted by several *N.*  
 66 *gonorrhoeae* sequencing studies (7, 8). WGS now has the ability to identify *N.*  
 67 *gonorrhoeae* transmission links in the absence of traditional contact-tracing data (8),  
 68 as well as to reveal geographical and temporal spread and bridging across sexual  
 69 networks of particular strains (9).

70  
 71 In this study we aimed to utilise WGS to better understand transmission dynamics  
 72 within a potentially new outbreak of *N. gonorrhoeae* infection among heterosexuals  
 73 living within urban areas of NSW, Australia. This was prompted by the above studies  
 74 and more recent unpublished data showing increasing notifications among older

75 individuals in urban areas of Australia, including females. Understanding these trends  
76 is important, particularly in light of the potential for increasing disease, including  
77 pelvic inflammatory disease among females and also because older age is not  
78 typically viewed as a key risk factor for acquiring gonorrhoea amongst heterosexuals.  
79 Here, we sequenced the genomes of all available isolates from females that belonged  
80 to the most common gonococcal strain identified in the previous studies (5, 6).

81

## 82 **Methods**

### 83 ***N. gonorrhoeae* isolates**

84 A total of 94 *N. gonorrhoeae* isolates from 87 female patients from two previous  
85 investigations were included in this study. The samples comprised 31 vaginal swabs,  
86 27 cervical swabs, 33 throat swabs, 1 rectal swab, 1 eye swab and 1 genital swab. Age  
87 groups for the patients were; 18-24 years (n = 29), 25-34 (n = 31), 35-44 (n = 14), 45-  
88 54 (n = 11), 55 and over (n = 9). The isolates were from NSW, Australia and were  
89 isolated in January to June of 2012 (n = 59) and January to June of 2014 (n = 35). The  
90 isolate metadata is summarised in Supplementary Table 1. All 94 isolates were  
91 indistinguishable on the basis of iPLEX massarray genotyping. It should be noted that  
92 different names were used to describe these strains in the previous studies; the year  
93 2012 isolates were originally described as belonging to strain-type “S01” and  
94 genotype “G122” (Supplementary Table 3 in (5)). The year 2014 isolates were called  
95 “NSW-001”. For consistency in this study, all 94 isolates will be referred to as being  
96 of genotype G122.

### 97 ***N. gonorrhoeae* isolates from the United Kingdom**

98 To provide context for the degree of variation among the NSW genomes, analyses of  
99 genome data from 1,870 *N. gonorrhoeae* isolates from a recent investigation (8) based

100 in Brighton, United Kingdom (UK) were included. The UK genome data was chosen  
101 for comparison because it was the largest collection of *N. gonorrhoeae* genome data  
102 with unbiased isolate selection and a collection period (2011-2015) that coincided  
103 with the NSW isolates (collected in 2012 and 2014).

#### 104 **DNA extraction, sequencing and assembly**

105 A single colony from each isolate was cultured on LB agar and incubated at 37°C,  
106 enriched with 5% CO<sub>2</sub> for approximately 18-24 hours. Genomic DNA was extracted  
107 from half of a 10µl loop of culture growth using the Ultraclean Microbial DNA  
108 Isolate Kit (GeneWorks, Australia), using the ‘Alternative Lysis Method’ as per  
109 manufacturer’s instructions. Libraries were prepared using the Illumina Nextera XT  
110 protocol, with 125bp paired-end reads generated using the Illumina HiSeq instrument  
111 (AGRF, Melbourne, Australia), with HiSeq 2500 V4 chemistry. Raw sequence reads  
112 from the 94 samples were assessed in FastQC v0.11.4 (10) and hard trimmed to 100bp  
113 using Neson v0.132 (11). The 94 NSW genomes were assembled in parallel with the  
114 1,870 *N. gonorrhoeae* genomes from the UK (8). The UK genomes were acquired  
115 from the NCBI Short Read Archive under BioProject PRJNA315363  
116 (<https://www.ncbi.nlm.nih.gov/bioproject/315363>). The quality trimmed reads from  
117 both NSW and the UK datasets underwent *de novo* assembly using SPAdes v3.6.2  
118 (12) and MegaHit v1.0.3 (13), respectively. Sequence read and assembly metrics are  
119 summarised for all NSW genomes in Supplementary Table 2. Sequence read data for  
120 all NSW isolates were submitted to the NCBI Short Read Archive under BioProject  
121 PRJNA392203 (<https://www.ncbi.nlm.nih.gov/bioproject/392203>). The taxonomic  
122 sequence classification tool Kraken v0.10.5 (14) was initially used to confirm each  
123 genome as *N. gonorrhoeae* species. Exclusion criteria applied to the UK genomes  
124 included: (i) a genome size greater than 3Mbp, (ii) a genome that had >350 contigs

125 and, (iii) a genome percentage identity according to Kraken of <75% for *N.*

126 *gonorrhoeae*.

## 127 **Genotyping**

128 *In silico* analyses were used to determine multilocus sequence type (MLST) for all

129 NSW and UK genomes. Briefly, the MLST profile was determined using mlst v2.1

130 (15), providing a seven-locus typing scheme commonly used for *Neisseria* species

131 (*abcZ*, *adk*, *aroE*, *fumC*, *gdh*, *pdhC* and *pgm*). For the 94 NSW genomes, *N.*

132 *gonorrhoeae* multi-antigen sequence type (NG-MAST) was determined using

133 NGMASTER (16). Sequences with different NG-MAST profiles were compared

134 using BioEdit v7.0.9.0 (17). Novel NG-MAST profiles were uploaded to the NG-

135 MAST database (<http://www.ng-mast.net/>). The NG-MAST predictions for the UK

136 genomes were kindly provided by Dr David Eyre, University of Oxford, UK (personal

137 communication).

## 138 **Phylogenetic analyses**

139 All phylogenetic trees were constructed using a core SNP alignment following the

140 removal of recombinant regions. Genomes were aligned using Parsnp v1.2 (18) by

141 randomly selecting a NSW genome (AU2012-573) to act as a reference, followed by

142 the prediction and removal of recombinant regions using Gubbins v2.1.0 (19).

143 Phylogenetic analyses based on core SNP alignments for both the NSW and UK

144 genomes were achieved using RAxML v8.2.9 (20) using a general-time reversible

145 nucleotide substitution model with a GAMMA correction for site variation.

146 Phylogenetic trees were visualised using FigTree v1.4.2, Evolview v2 or iTOL v3

147 (21-23).

## 148 **Mutations associated with antimicrobial resistance**

149 All 94 NSW genomes and closely related UK genomes, underwent annotation via  
150 Prokka v1.11 (24). A combination of the method outlined below and BIGSdb (25)  
151 were used to assess loci associated with antimicrobial resistance (AMR) including;  
152 *gyrA*, *folP*, *mtrR*, *parC*, *parE*, *penA*, *ponA*, *porB*, *rpoB*, *rpsE*, *rspJ* and 23S rRNA.  
153 Using BLAST+ and reference sequences derived from characterised WHO-F and  
154 WHO-U strains (26), loci were extracted from an annotated multi-fasta file using  
155 seqtk (27). Sequences were aligned and inspected using Clustal Omega (28).

156

## 157 **Results**

### 158 **Phylogenetic analysis of NSW genotype G122 isolates in the context of a broad** 159 **collection of UK isolates**

160 The core SNP phylogeny (Figure 1A) included all NSW isolates and 1,796 of the  
161 1,870 UK genomes; 74 UK genomes were removed from further analysis on the basis  
162 of the above exclusion criteria. The unrooted maximum likelihood phylogeny in  
163 Figure 1A shows a diverse range of strains from the UK. Figure 1B shows all 94  
164 NSW genomes tightly cluster in a single clade with six UK genomes (SRR3350090,  
165 SRR3343655, SRR3350214, SRR3350225 and SRR3343534, SRR3350146). All  
166 genomes in this clade (hereafter called the G122 clade) were MLST 7359, while all 6  
167 UK genomes and the majority of NSW genomes (n = 86) were NG-MAST 4186. The  
168 remaining NSW isolates comprised four previously described NG-MAST types (NG-  
169 MAST 6759, n = 2; NG-MAST 6767, n = 2; NG-MAST 15344, n = 2 and NG-MAST  
170 15348, n = 1) as well as one novel NG-MAST profile (NG-MAST 15609, n = 1). All  
171 NG-MAST profiles shared the same *thpB* 241 allele but differed by their *porB*  
172 sequences which shared >99% nucleotide identity, indicating they all belonged to the  
173 same genogroup (29); which we assigned as “genogroup 4186”. Based on the most

174 recent common ancestor, isolates in the G122 clade differ by <200 core SNPs from  
175 isolates in the nearest sister clade, comprising 9 UK genomes that are all MLST 7826  
176 and NG-MAST 2487 (Figure 1B). Both clades form a distinct lineage approximately  
177 1000 core SNPs distant to the nearest split in the underlying *N. gonorrhoeae*  
178 phylogeny (Figure 1A).

179

## 180 **Phylogenetic analysis of the G122 clade**

181 To investigate the genetic relationships between G122 isolates at the single nucleotide  
182 level we determined a core SNP phylogeny of all 94 NSW genomes and the six  
183 related UK genomes (Figure 2). The majority of isolates belong to one of five clusters  
184 (C1 to C5) comprising six or more isolates that each share a defining SNP and a  
185 common ancestor indicating a transmission network (Figure 2). The maximum core  
186 SNP difference between genomes in each cluster, C1 to C5 respectively, were 6, 4,  
187 19, 21 and 14 SNPs. Of these clusters, only three (C3, C4 and C5) comprised isolates  
188 from both years 2012 and 2014 whereas C1 and C2 comprised isolates from year  
189 2012 only. Age group for clusters C3 to C5 ranged from 18-24 to 55 and over  
190 (median = 25.5, 32 and 25 years respectively), while C1 ranged from 18-24 to 45-54  
191 (median = 35.5) and C2 ranged from 25-34 to 45-54 (median = 45.5). The percentage  
192 of cervical/vaginal and throat samples respectively for each cluster were 33% and  
193 67% for both C1 and C2, 57% and 36% for C3, 65% and 35% for C4 and 58% and  
194 42% for C5 (summarised in Supplementary Table 3).

195

196 Genome AU2012-768 contained 33 distinct core SNPs, recombination analysis  
197 identified three highly SNP-dense regions that were filtered prior to tree-building.



198 Manual inspection of these regions revealed multiple SNPs were shared between  
199 AU2012-768 and the outlying UK genome (SRR3360636) used to root the phylogeny.

200

## 201 **Diversity of G122 isolates within patients**

202 Six individuals with more than one isolate were included in our study (Patients ‘PA’  
203 to ‘PF’). The respective genomes from these six patients differed by less than seven  
204 core SNPs. Patient ‘PA’ had a throat and cervical swab collected on the same day, and  
205 was the only individual with more than one isolate that had indistinguishable core  
206 SNPs. Patients ‘PB’, ‘PC’ and ‘PD’ also had their respective isolates collected on the  
207 same day from different sample sites, but showed a difference of 2-7 core SNPs. The  
208 remaining patients, PE and PF, each had different isolates collected between one and  
209 eleven days respectively and both differed by 2 core SNPs.

210

## 211 **Genetic links between patients**

212 There were 6 instances where isolates had indistinguishable core SNPs and have been  
213 labelled as groups G1 to G6; these comprised either 3 isolates (G3) or 2 isolates each  
214 (G1, G2, G4, G5 and G6). Group G4 involved a single patient (patient ‘PA’ as  
215 described above) whereas the remaining 5 groups all involved different patients. The  
216 three isolates from group G3 were collected within 6 weeks of each other (data not  
217 shown) even though the collection dates provided in this study indicate a 3 month  
218 period (Supplementary Table 1). The isolates for groups G1, G2, G5 and G6 were all  
219 collected within one month of each other.

220

## 221 **Antimicrobial resistance determinants of the G122 clade**

222 Consistent with antibiotic susceptibility data for G122 isolates (5), the 94 NSW  
223 isolates had wildtype copies of the assessed AMR genes with the exception of  
224 harbouring the PBP2 345A insertion (Supplementary Table 4). Although the 345A  
225 insertion has been associated with penicillin-resistance (30) all NSW isolates were  
226 phenotypically susceptible to penicillin.

227

## 228 **Discussion**

229 Overall the sequencing results show that isolates from the previously identified SNP-  
230 type are indeed closely related strains and, given they were all from females, provides  
231 further evidence of sustained transmission of this strain amongst heterosexuals.  
232 Moreover, the enhanced resolution provided by the phylogenetic analyses has  
233 provided new information regarding transmission of this strain within local sexual  
234 networks.

235

236 This study included six patients (PA to PF) for which more than one isolate was  
237 collected. The observed SNP variation within each patient was found to be minimal,  
238 ranging from 0-7 core SNPs. This within-patient genomic stability is not surprising  
239 and is consistent with a previous study (8). However, it provides an interesting  
240 context when considering the results for the five groups of patients (G1, G2, G3, G5  
241 and G6; Figure 2) all of which involved different individuals having identical core  
242 SNPs. Such results are suggestive of tight transmission networks, perhaps even a  
243 common infection source for these patients. Of note were three females belonging to  
244 group G3 that shared identical core SNPs over a six week period. This observation  
245 would be consistent with a common infection source, possibly a male having multiple  
246 sexual partners and not actively seeking treatment. Behavioural data were not

247 available to confirm this. Nevertheless, it should be noted that in the absence of these  
248 genomic data it would otherwise be very difficult to identify such clusters,  
249 particularly when patients are often unwilling or unable to provide details regarding  
250 sexual partners (31). Hence, these data highlight a potential role that WGS could have  
251 (assuming it could be achieved within a timely manner) in enhancing contact tracing,  
252 whereby the data are used to help pinpoint key groups of individuals for intervention.

253

254 The data also provide some evidence that CSW and certainly unprotected fellatio are  
255 not key drivers perpetuating this G122 genotype in the population. Previous reports  
256 have shown high rates of condom use for vaginal sex, but lower rates for both oral sex  
257 and non-paying partners among CSW (32, 33). Thus, if CSW were responsible then  
258 one would have expected clusters of pharyngeal infections among these individuals.  
259 In contrast, the phylogeny depicts clusters comprising a more even distribution of  
260 both pharyngeal and vaginal infections, suggesting that CSW alone is unlikely to be  
261 responsible for sustaining transmission of this genotype.

262

263 Of further interest in this study was the number of females in older age groups, with  
264 21% of patients being 45 years or older. While there was some limited evidence of  
265 transmission within older ages (for example, cluster C2 predominately comprised  
266 individuals 45 years or older), the overall phylogeny suggested that gonorrhoea was  
267 not being sustained within distinct networks of older ( $\geq 45$  years) individuals. Rather,  
268 the observed networks comprised a broad range of age groups and suggested that  
269 older individuals were acquiring infections that were otherwise being sustained in  
270 younger, more sexually active age groups. Further studies are needed to investigate  
271 this. However, current Australian federal policies promote sexual health to younger

272 individuals and those of reproductive age as they are considered to be the most at risk  
273 for further complications (34). Given our data indicate networks of individuals  
274 comprising of varying ages, education on STI prevention may be more suited towards  
275 a broad range of age groups, including older ages and especially those engaging in  
276 new sexual relationships (35).

277

278 A recent comprehensive investigation applying WGS to *N. gonorrhoeae* isolates  
279 within Brighton, UK, allowed us to provide additional context for our genomes  
280 among a broader population. Interestingly, our common Australian strain only  
281 comprised 0.3% of isolates assessed from the Brighton study. It is difficult to  
282 speculate on the significance of these differences, however it may have only recently  
283 been introduced into the UK, perhaps via individuals travelling between the two  
284 regions. However, we note that NG-MAST 4186, which is associated with genotype  
285 G122, has been previously documented elsewhere, including Japan (36) and New  
286 Zealand (37) at relatively high prevalence (5.2% and 10.8% of strains respectively).  
287 Little is known as to why some *N. gonorrhoeae* strains may be more successful in a  
288 given population than others. Of interest was that our G122 genotype lacked almost  
289 all commonly reported *N. gonorrhoeae* AMR mechanisms, however current thinking  
290 is that these AMR mutations do not confer a fitness disadvantage (38). Therefore it is  
291 likely that other factors, possibly unrecognised virulence mechanisms, may be  
292 important in sustaining this genotype.

293

294 There were several limitations associated with this study, firstly that we did not access  
295 behavioural data; and secondly males were not assessed. However, the decision to  
296 exclude males was deliberate, and was done so as to focus on heterosexuals and limit

297 any potential signal from MSM; Thirdly we only included isolates from two six-  
298 month time periods that were two years apart.

299

300 In summary, we have used whole genome sequencing to confirm transmission of a  
301 particular strain of *N. gonorrhoeae* amongst females in urban areas of Australia from  
302 2012 and 2014. The use of WGS and its enhanced resolution has revealed features of  
303 local sexual networks that would not otherwise be apparent through routine  
304 surveillance activities. These data provide evidence of the additional value that WGS  
305 could provide in *N. gonorrhoeae* outbreak investigations. The information may also  
306 provide additional benefit for further studies aimed at identifying virulence markers  
307 that are important in maintaining such strains in the population.

308

### 309 **Funding**

310 This work was supported by the Australian Infectious Diseases Research Centre and  
311 the National Health and Medical Research Council (GNT1090456 and GNT1105128  
312 to S.A.B and D.M.W, respectively).

313

### 314 **Acknowledgments**

315 We thank Dr Tiffany Hogan from Prince of Wales Hospital, New South Wales for her  
316 assistance with this study. This study was conducted as part of the reference work of  
317 the National Neisseria Network (NNN), Australia, which is funded by the Australian  
318 Government Department of Health.

319

### 320 **References**

- 321 1. Communicable Diseases Network Australia. National Notifiable Diseases  
322 Surveillance System. Department of Health, Australian Government; 2016. Available  
323 at: <http://www9.health.gov.au/cda/source/cda-index.cfm>. Accessed 04 May 2017
- 324 2. Roberts-Witteveen A, Pennington K, Higgins N, Lang C, Lahra M, Waddell  
325 R, et al. Epidemiology of gonorrhoea notifications in Australia, 2007–12. Sexual  
326 Health. 2014;11(4):324-31.
- 327 3. Lusk MJ, Uddin RN, Lahra MM, Garden FL, Kundu RL, Konecny P.  
328 Pharyngeal Gonorrhoea in Women: An Important Reservoir for Increasing Neisseria  
329 gonorrhoea Prevalence in Urban Australian Heterosexuals? J Sex Transm Dis.  
330 2013;2013:967471.
- 331 4. McDonagh P, Ryder N, McNulty AM, Freedman E. Neisseria gonorrhoeae  
332 infection in urban Sydney women: prevalence and predictors. Sex Health.  
333 2009;6(3):241-4.
- 334 5. Trembizki E, Wand H, Donovan B, Chen M, Fairley CK, Freeman K, et al.  
335 The Molecular Epidemiology and Antimicrobial Resistance of Neisseria gonorrhoeae  
336 in Australia: A Nationwide Cross-Sectional Study, 2012. Clin Infect Dis.  
337 2016;63(12):1591-8.
- 338 6. Lahra MM, Trembizki E, Buckley C, Donovan B, Chen M, Guy R, et al.  
339 Changes in the rates of Neisseria gonorrhoeae antimicrobial resistance are primarily  
340 driven by dynamic fluctuations in common gonococcal genotypes. J Antimicrob  
341 Chemother. 2017;72(3):705-11.
- 342 7. Didelot X, Dordel J, Whittles LK, Collins C, Bilek N, Bishop CJ, et al.  
343 Genomic Analysis and Comparison of Two Gonorrhea Outbreaks. MBio. 2016;7(3).

- 344 8. De Silva D, Peters J, Cole K, Cole MJ, Cresswell F, Dean G, et al. Whole-  
345 genome sequencing to determine transmission of *Neisseria gonorrhoeae*: an  
346 observational study. *Lancet Infect Dis*. 2016;16(11):1295-303.
- 347 9. Grad YH, Kirkcaldy RD, Trees D, Dordel J, Harris SR, Goldstein E, et al.  
348 Genomic epidemiology of *Neisseria gonorrhoeae* with reduced susceptibility to  
349 cefixime in the USA: a retrospective observational study. *Lancet Infect Dis*.  
350 2014;14(3):220-6.
- 351 10. Andrews S. FastQC: A Quality Control tool for High Throughput Sequence  
352 Data. 2010. Available at: <http://www.bioinformatics.babraham.ac.uk/projects/fastqc/>.  
353 Accessed 10 January 2017.
- 354 11. Victorian-Bioinformatics-Consortium. Nsoni. 2013. Available at:  
355 <https://github.com/Victorian-Bioinformatics-Consortium/nsoni>. Accessed 12 January  
356 2017.
- 357 12. Bankevich A, Nurk S, Antipov D, Gurevich AA, Dvorkin M, Kulikov AS, et  
358 al. SPAdes: a new genome assembly algorithm and its applications to single-cell  
359 sequencing. *J Comput Biol*. 2012;19(5):455-77.
- 360 13. Li D, Liu CM, Luo R, Sadakane K, Lam TW. MEGAHIT: an ultra-fast single-  
361 node solution for large and complex metagenomics assembly via succinct de Bruijn  
362 graph. *Bioinformatics*. 2015;31(10):1674-6.
- 363 14. Wood DE, Salzberg SL. Kraken: ultrafast metagenomic sequence  
364 classification using exact alignments. *Genome Biol*. 2014;15(3):R46.
- 365 15. Seemann T. mlst. Available at: <https://github.com/tseemann/mlst>. Accessed 13  
366 January 2017.

16. Kwong JC, Goncalves da Silva A, Dyet K, Williamson DA, Stinear TP, Howden BP, et al. NGMASTER:in silico multi-antigen sequence typing for *Neisseria gonorrhoeae*. *Microb Genom.* 2016;2(8):e000076.
17. Hall TA. BioEdit: a user-friendly biological sequence alignment editor and analysis program for Windows 95/98/NT. *Nucleic acids symposium series.* 1999; 41:95-8.
18. Treangen TJ, Ondov BD, Koren S, Phillippy AM. The Harvest suite for rapid core-genome alignment and visualization of thousands of intraspecific microbial genomes. *Genome Biol.* 2014;15(11):524.
19. Croucher NJ, Page AJ, Connor TR, Delaney AJ, Keane JA, Bentley SD, et al. Rapid phylogenetic analysis of large samples of recombinant bacterial whole genome sequences using Gubbins. *Nucleic Acids Res.* 2015;43(3):e15.
20. Stamatakis A. RAxML version 8: a tool for phylogenetic analysis and post-analysis of large phylogenies. *Bioinformatics.* 2014;30(9):1312-3.
21. Rambaut A. FigTree. 2007. Available at: <http://tree.bio.ed.ac.uk/software/figtree/>. Accessed 16 February 2017.
22. He Z, Zhang H, Gao S, Lercher MJ, Chen WH, Hu S. Evolvview v2: an online visualization and management tool for customized and annotated phylogenetic trees. *Nucleic Acids Res.* 2016;44(W1):W236-41.
23. Letunic I, Bork P. Interactive tree of life (iTOL) v3: an online tool for the display and annotation of phylogenetic and other trees. *Nucleic Acids Res.* 2016;44(W1):W242-5.
24. Seemann T. Prokka: rapid prokaryotic genome annotation. *Bioinformatics.* 2014;30(14):2068-9.



- 391 25. Jolley KA, Maiden MC. BIGSdb: Scalable analysis of bacterial genome  
392 variation at the population level. BMC Bioinformatics. 2010;11:595.
- 393 26. Unemo M, Golparian D, Sanchez-Buso L, Grad Y, Jacobsson S, Ohnishi M, et  
394 al. The novel 2016 WHO *Neisseria gonorrhoeae* reference strains for global quality  
395 assurance of laboratory investigations: phenotypic, genetic and reference genome  
396 characterization. J Antimicrob Chemother. 2016.
- 397 27. Li H. seqtk: Toolkit for processing sequences in FASTA/Q formats. Available  
398 at: <https://github.com/lh3/seqtk>. Accessed 08 February 2017.
- 399 28. Sievers F, Wilm A, Dineen D, Gibson TJ, Karplus K, Li W, et al. Fast,  
400 scalable generation of high-quality protein multiple sequence alignments using  
401 Clustal Omega. Mol Syst Biol. 2011;7:539.
- 402 29. European Centre for Disease Prevention and Control. Molecular typing of  
403 *Neisseria gonorrhoeae* - results from a pilot study 2010-2011. European Centre for  
404 Disease Prevention and Control, Stockholm **2012**. Available at:  
405 <https://ecdc.europa.eu/sites/portal/files/media/en/publications/Publications/201211109>  
406 -Molecular-typing-gonorrhea.pdf. Accessed 11 April 2017.
- 407 30. Dowson CG, Jephcott AE, Gough KR, Spratt BG. Penicillin-binding protein 2  
408 genes of non-beta-lactamase-producing, penicillin-resistant strains of *Neisseria*  
409 *gonorrhoeae*. Mol Microbiol. 1989;3(1):35-41.
- 410 31. Doherty IA, Padian NS, Marlow C, Aral SO. Determinants and consequences  
411 of sexual networks as they affect the spread of sexually transmitted infections. J Infect  
412 Dis. 2005;191 Suppl 1:S42-54.
- 413 32. Donovan B, Harcourt, C., Egger, S., Watchirs Smith, L., Schneider, K.,  
414 Kaldor, J.M., Chen, M.Y., Fairley, C.K., Tabrizi, S. The Sex Industry in New South  
415 Wales: a Report to the NSW Ministry of Health. Kirby Institute University of New

- 416 South Wales, Sydney 2012. Available at: [http://www.acon.org.au/wp-](http://www.acon.org.au/wp-content/uploads/2015/04/NSW-Sex-Industry-Report-CSRH-2012.pdf)  
417 [content/uploads/2015/04/NSW-Sex-Industry-Report-CSRH-2012.pdf](http://www.acon.org.au/wp-content/uploads/2015/04/NSW-Sex-Industry-Report-CSRH-2012.pdf). Accessed 10  
418 April 2017.
- 419 33. Seib C, Debattista J, Fischer J, Dunne M, Najman JM. Sexually transmissible  
420 infections among sex workers and their clients: variation in prevalence between  
421 sectors of the industry. *Sex Health*. 2009;6(1):45-50.
- 422 34. Kirkman L, Kenny A, Fox C. Evidence of Absence: Midlife and Older Adult  
423 Sexual Health Policy in Australia. *Sexuality Research and Social Policy*.  
424 2013;10(2):135-48.
- 425 35. Heywood W, Lyons A, Fileborn B, Minichiello V, Barrett C, Brown G, et al.  
426 Self-reported testing and treatment histories among older Australian men and women  
427 who may be at risk of a sexually transmissible infection. *Sex Health*. 2016.
- 428 36. Shimuta K, Unemo M, Nakayama S, Morita-Ishihara T, Dorin M, Kawahata  
429 T, et al. Antimicrobial resistance and molecular typing of *Neisseria gonorrhoeae*  
430 isolates in Kyoto and Osaka, Japan, 2010 to 2012: intensified surveillance after  
431 identification of the first strain (H041) with high-level ceftriaxone resistance.  
432 *Antimicrob Agents Chemother*. 2013;57(11):5225-32.
- 433 37. Heffernan H WR, Williamson D. Institute of Environmental Science and  
434 Research Limited 2015. Available at:  
435 [https://surv.esr.cri.nz/PDF\\_surveillance/Antimicrobial/Gono/Ngonosurveyfinalreport](https://surv.esr.cri.nz/PDF_surveillance/Antimicrobial/Gono/Ngonosurveyfinalreport2015.pdf)  
436 [2015.pdf](https://surv.esr.cri.nz/PDF_surveillance/Antimicrobial/Gono/Ngonosurveyfinalreport2015.pdf). Accessed 10 April 2017.
- 437 38. Unemo M, Shafer WM. Antimicrobial resistance in *Neisseria gonorrhoeae* in  
438 the 21st century: past, evolution, and future. *Clin Microbiol Rev*. 2014;27(3):587-613.  
439
- 440 **Figure 1.**

441 (A) An unrooted maximum likelihood phylogeny constructed with 14,802 core single  
442 nucleotide polymorphisms (SNPs) from both New South Wales (NSW; n = 94) and  
443 the United Kingdom (UK; n = 1,796) genomes based on non-recombinant core  
444 regions. The scale bar represents SNPs. (B) An enhanced view of the branch  
445 containing two clades highlighted in green and blue. The green clade includes all  
446 NSW genomes and 6 UK genomes which comprised MLST 7359 and NG-MAST  
447 genogroup 4186. The next closest sister clade (in blue) comprised 9 unrelated MLST  
448 (7826) and NG-MAST (2487) UK genomes. The scale bar represents SNPs.

449 **Figure 2.**

450 A rooted maximum likelihood phylogeny constructed with 473 core single nucleotide  
451 polymorphisms (SNPs). It comprises the G122 clade containing all 94 New South  
452 Wales (NSW) genomes and 6 United Kingdom (UK) genomes. A UK genome  
453 (SRR3360636) from the next closest sister clade was selected as the outlying group to  
454 root the phylogeny. Five larger clusters of isolates (C1-C5) have been labelled based  
455 on the phylogeny. Coloured circles represent isolates from the same patient and  
456 coloured squares represent isolates from the UK (see key). Rectangles and their  
457 respective colour schemes correspond with date of collection, age group, sample site  
458 and NG-MAST profile (see key). The red isolate names with G1-G6 appended to the  
459 end, represent isolates that share identical core SNPs. Genome AU2012-768 has 33  
460 core SNPs however its branch is truncated for easier visualisation purposes. The scale  
461 bar represents SNPs.

**(A)**

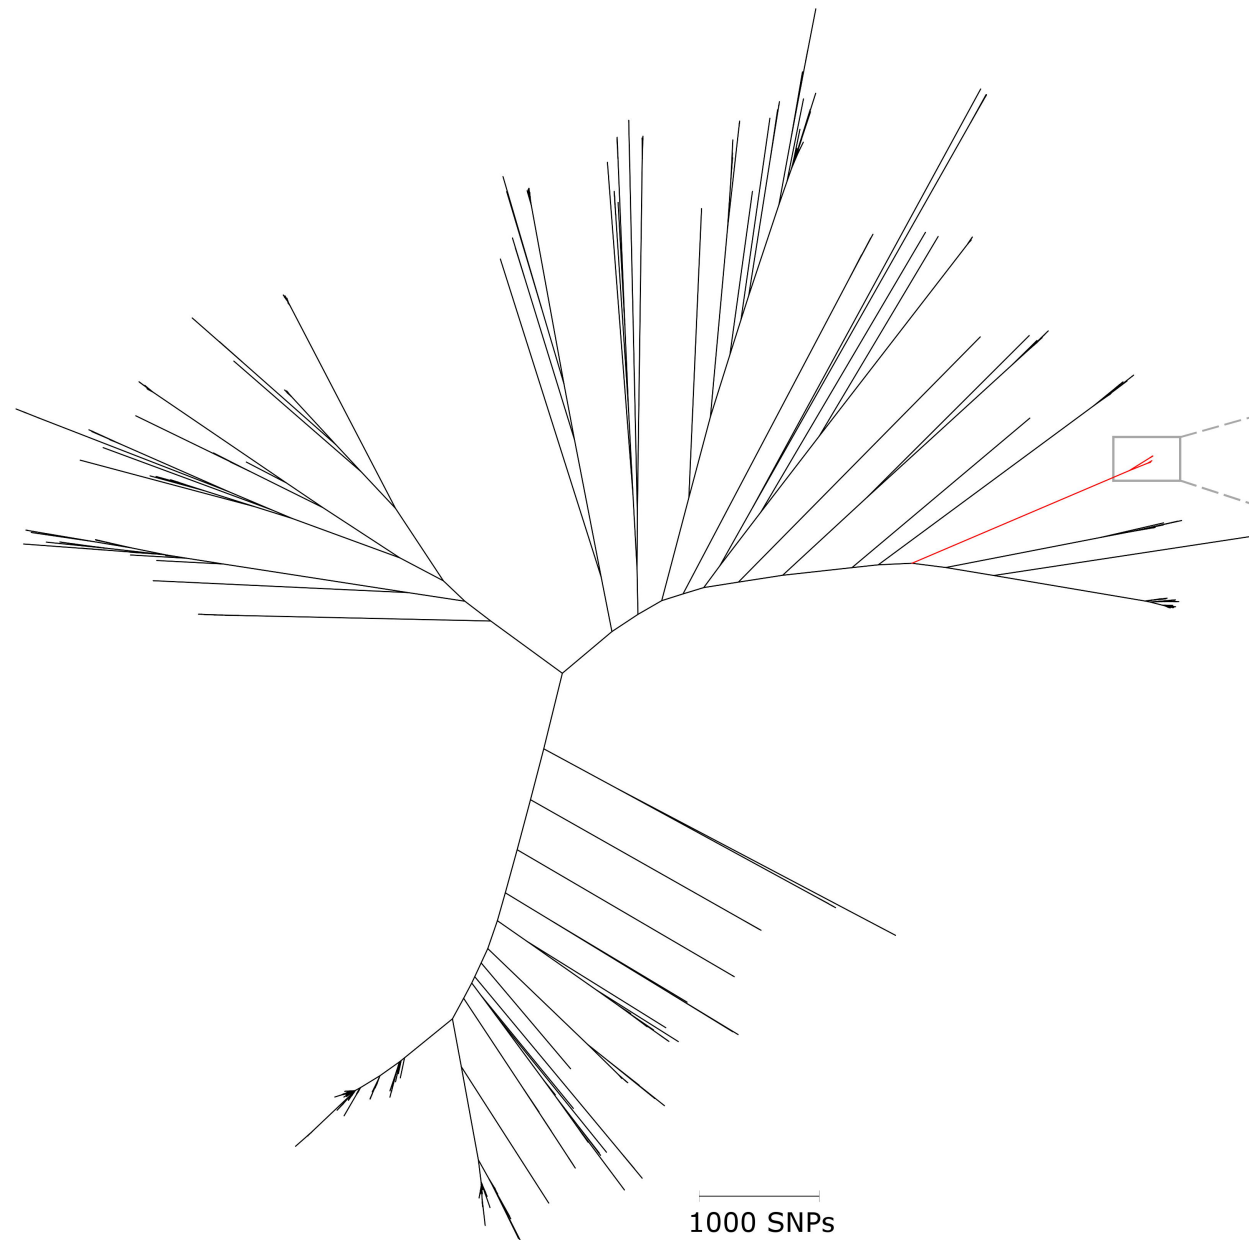

**(B)**

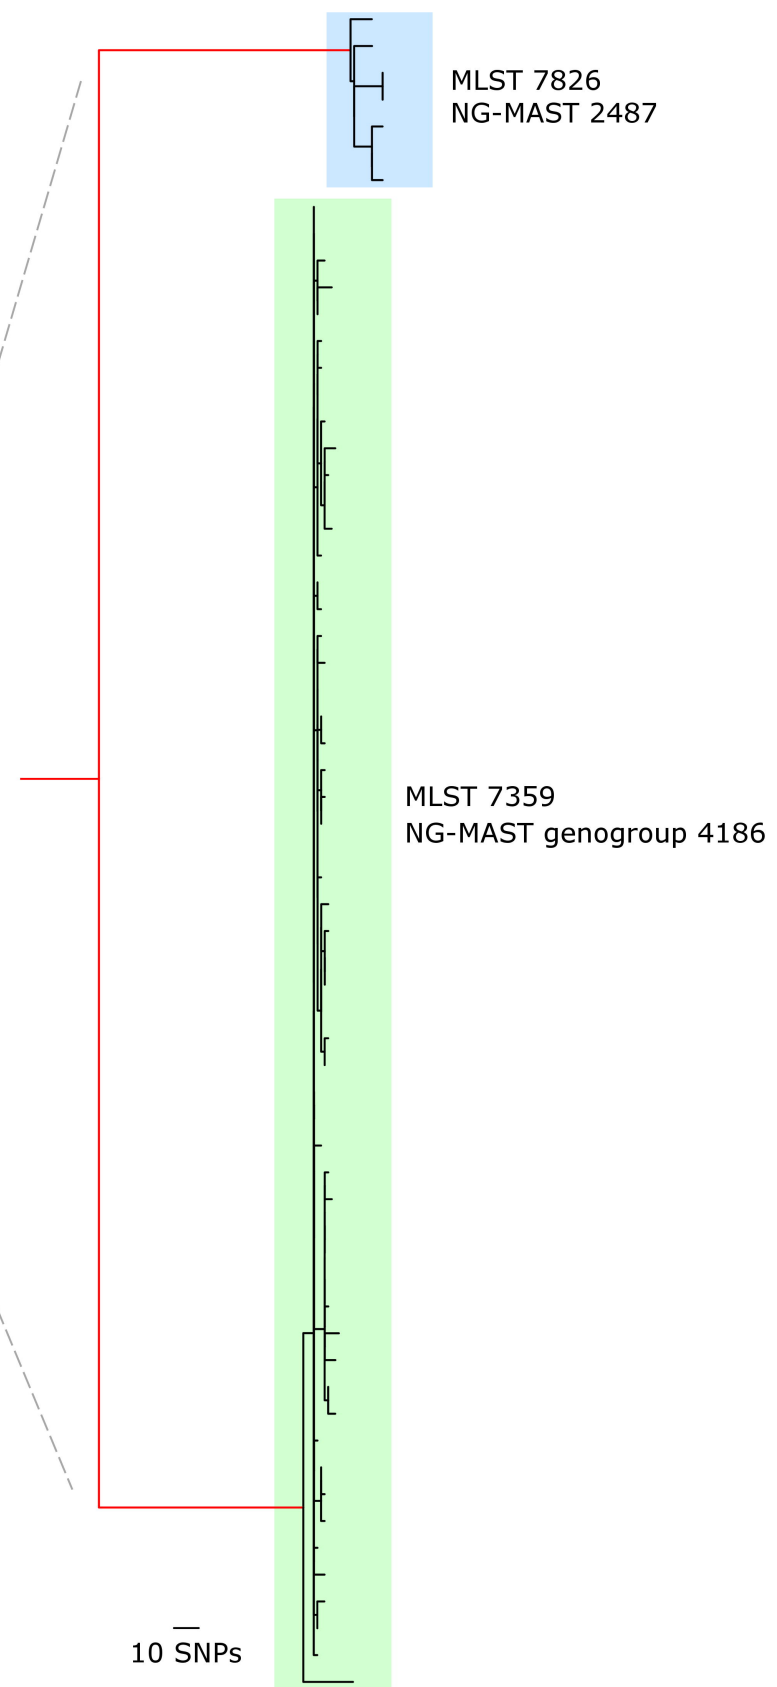

Patients with >1 Sample

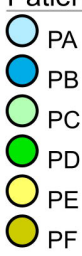

UK Samples

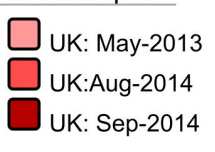

Year of collection

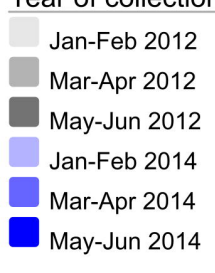

Age group

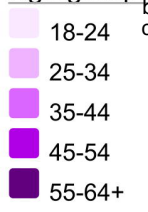

Sample site

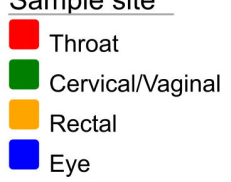

NG-MAST

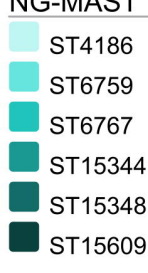

bioRxiv preprint doi: <https://doi.org/10.1101/175869>; this version posted August 18, 2017. The copyright holder for this preprint (which was not certified by peer review) is the author/funder, who has granted bioRxiv a license to display the preprint in perpetuity. It is made available under aCC-BY 4.0 International license.

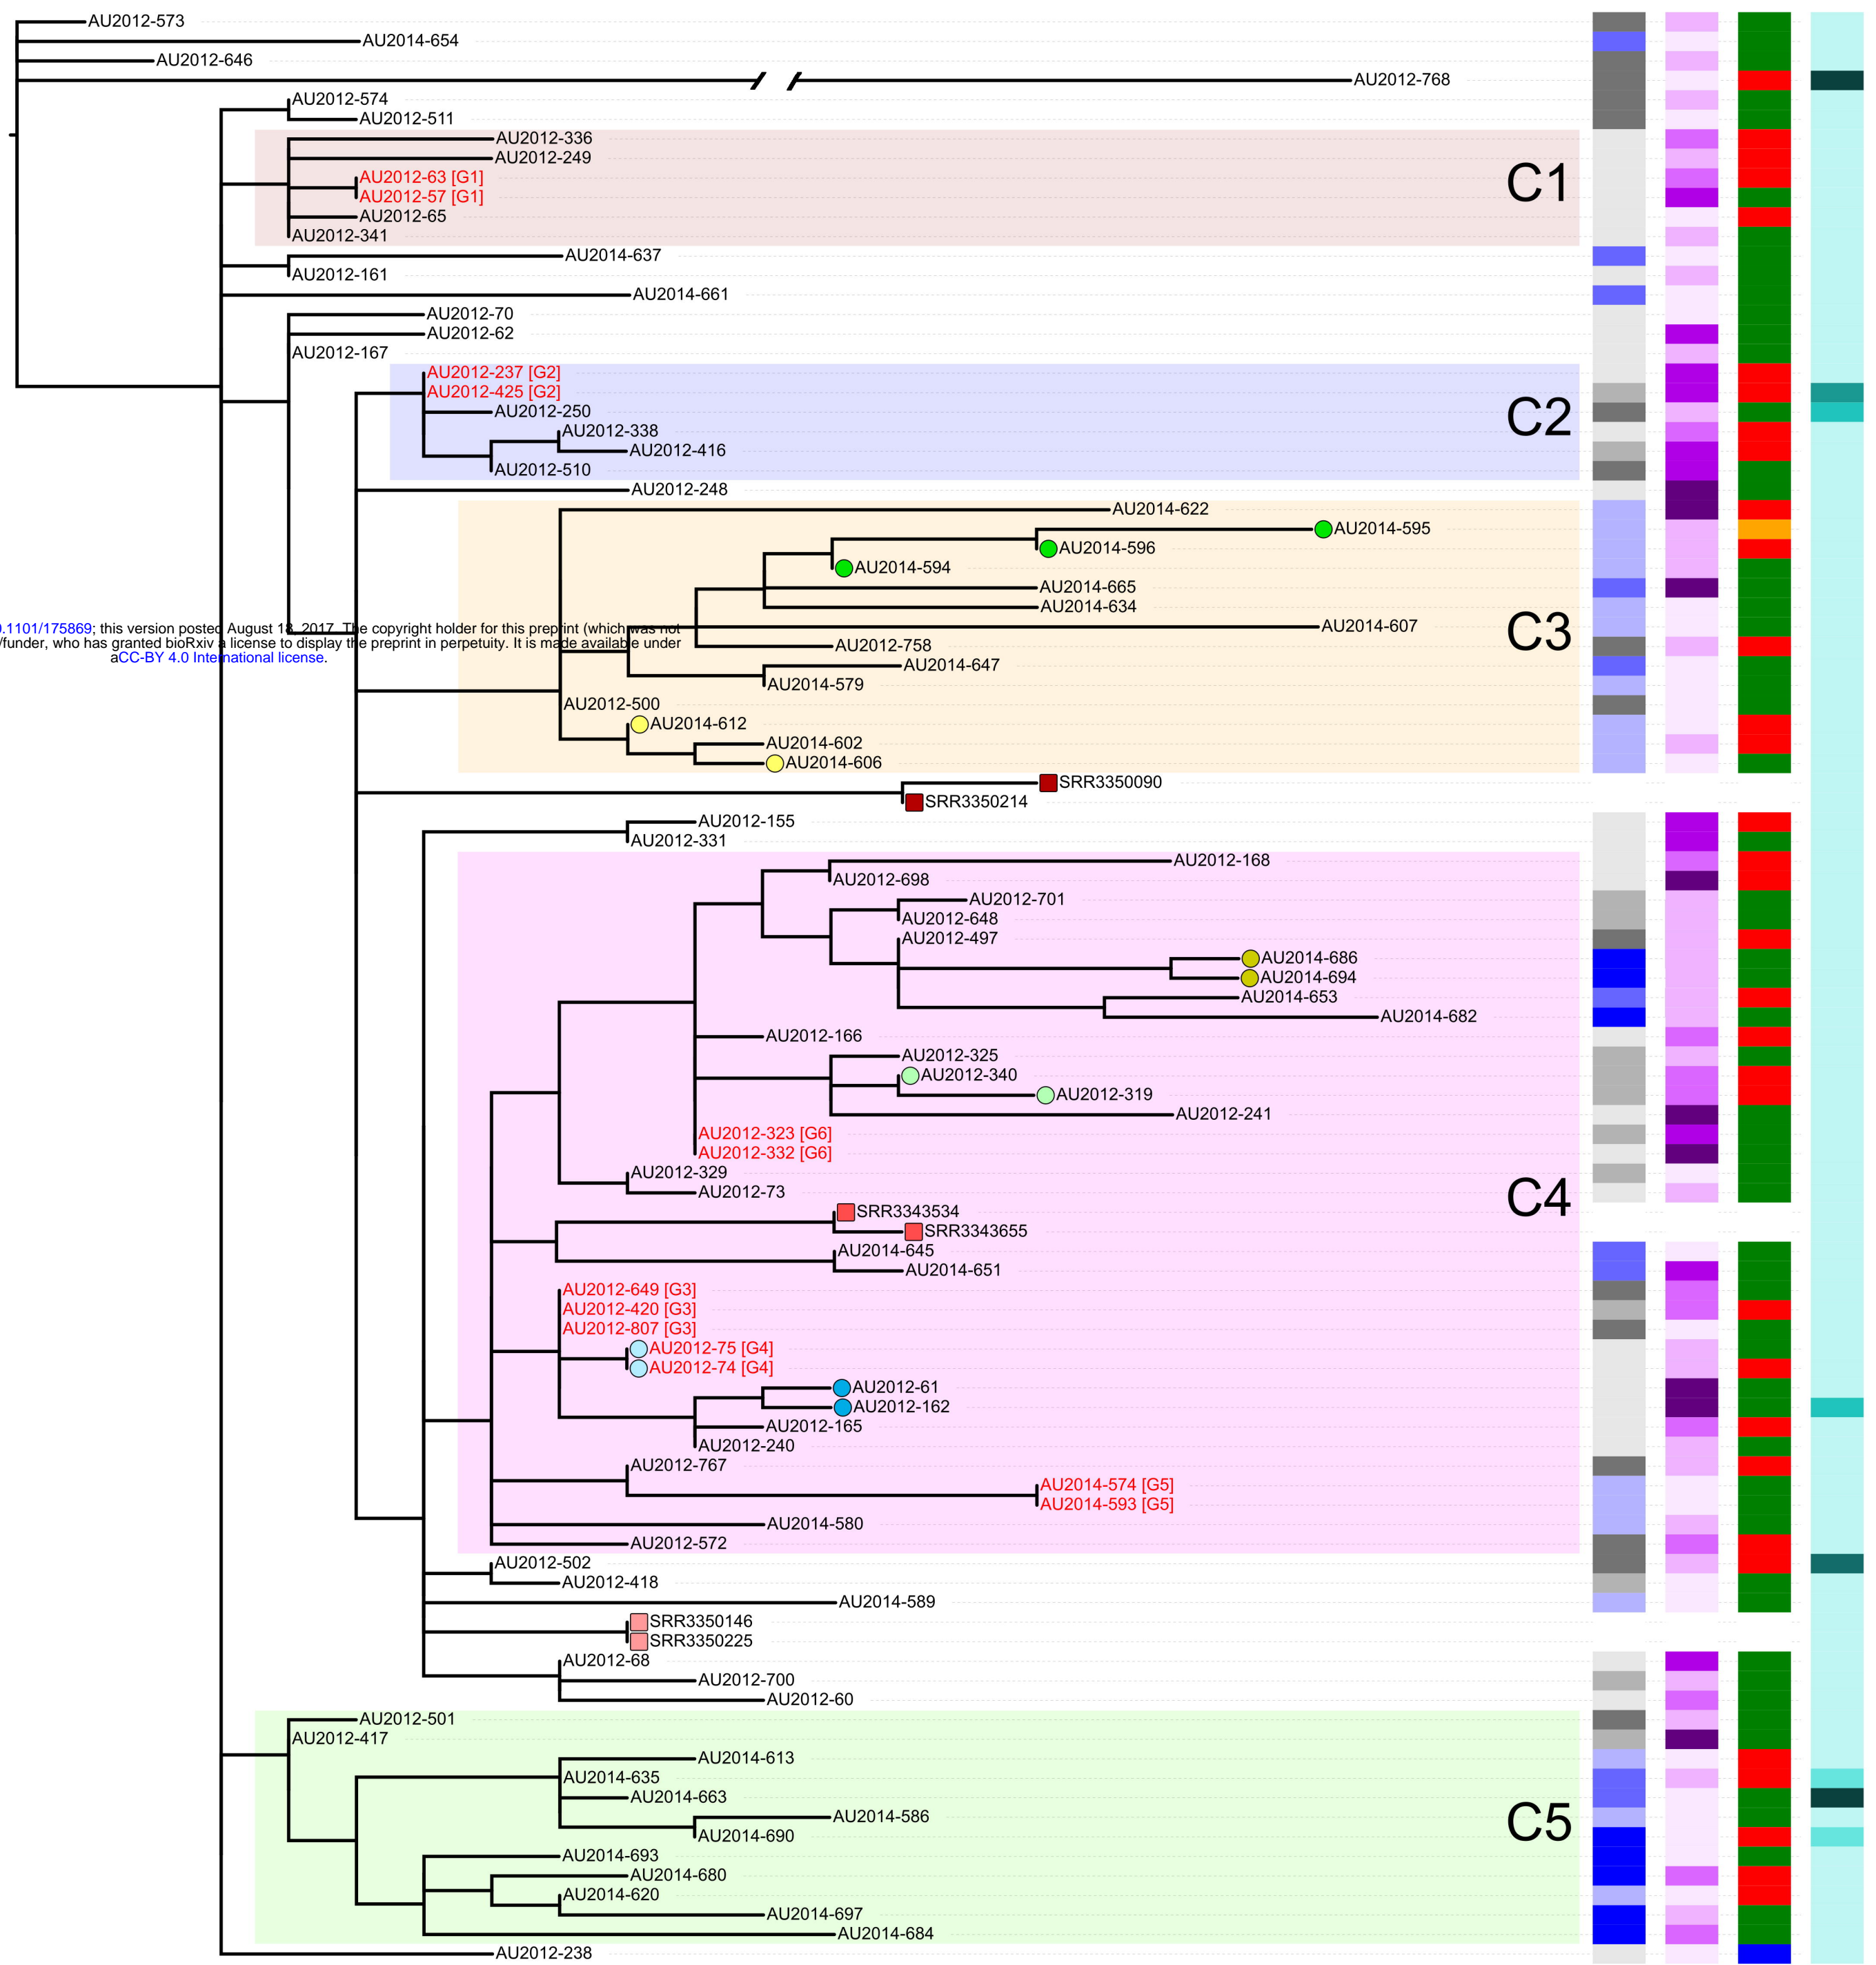

1 SNP
